# Supplementary material for: Discovery of Genes Related to Witches Broom Disease in Paulownia tomentosa × Paulownia fortunei by a De Novo Assembled Transcriptome
Source: PLoS One. 2013 Nov 21;8(11):e80238. doi: 10.1371/journal.pone.0080238 (PMC3836977; doi:10.1371/journal.pone.0080238)
Supplement: Table S1 — Annotation of differentially expressed genes. (XLSX) [file pone.0080238.s006.xlsx]

## Sheet: Sheet1
Table S1 Annotation of differentially expressed unigenes.
mRNA ID	Transcript ID	NR product	SWISSPROT product
m.10678	comp69254_c0_seq4	PREDICTED: pentatricopeptide repeat-containing protein At1g61870	Pentatricopeptide repeat-containing protein At1g61870, mitochondrial
m.10992	comp69415_c2_seq1	predicted protein
m.11257	comp69579_c0_seq6	B2 protein	B2 protein
m.11299	comp69607_c0_seq1	putative phospholipase	Monoglyceride lipase
m.12337	comp70195_c0_seq3	Hsp90 co-chaperone AHA1	Activator of 90 kDa heat shock protein ATPase homolog 1
m.13201	comp70564_c1_seq20	hypothetical protein VITISV_035033	RING-H2 finger protein ATL72
m.13687	comp70766_c0_seq1	pathogenesis-related protein	Major allergen Pru ar 1
m.14519	comp71078_c1_seq18	formiminotransferase-cyclodeaminase
m.15901	comp71561_c1_seq47	5'-aminoimidazole ribonucleotide synthetase	Phosphoribosylformylglycinamidine cyclo-ligase, chloroplastic/mitochondrial
m.16215	comp71668_c0_seq13	PREDICTED: purple acid phosphatase 23	Purple acid phosphatase 15
m.18108	comp72332_c0_seq9	PREDICTED: transcription factor ASG4-like	Transcription factor ASG4
m.19128	comp72585_c0_seq2	PREDICTED: uncharacterized protein LOC100256691
m.19600	comp72717_c0_seq7	PREDICTED: uncharacterized protein At2g39920-like	Uncharacterized protein At2g39920
m.19606	comp72717_c0_seq13	hypothetical protein RCOM_0498450	Uncharacterized protein At2g39920
m.20989	comp73071_c0_seq7	KHG/KDPG aldolase	KHG/KDPG aldolase
m.21592	comp73257_c0_seq3	PREDICTED: ABC transporter A family member 2-like	ABC transporter A family member 2
m.21648	comp73268_c0_seq3	hypothetical protein POPTRDRAFT_231473	Auxin-induced protein 5NG4
m.23392	comp73731_c0_seq3	PREDICTED: uncharacterized protein LOC100258654
m.24043	comp73882_c0_seq9	laccase	Laccase-2
m.24349	comp73946_c0_seq3	PREDICTED: anoctamin-7-like	Anoctamin-like protein At1g73020
m.25131	comp74119_c0_seq4	PREDICTED: uncharacterized protein LOC100250497	[Protein-PII] uridylyltransferase
m.26876	comp74572_c0_seq3	unnamed protein product
m.28037	comp74840_c1_seq6	putative strictosidine beta-D-glucosidase	Beta-glucosidase 24
m.28109	comp74859_c0_seq11	prolyl oligopeptidase	Prolyl endopeptidase
m.28822	comp74999_c2_seq38	PREDICTED: probable WRKY transcription factor 20-like	Probable WRKY transcription factor 20
m.28831	comp74999_c2_seq47	PREDICTED: probable WRKY transcription factor 20-like	Probable WRKY transcription factor 20
m.29942	comp75220_c1_seq3	ACI112 protein
m.30036	comp75256_c0_seq16	PREDICTED: AP2-like ethylene-responsive transcription factor At2g41710-like	AP2-like ethylene-responsive transcription factor At2g41710
m.31344	comp75517_c0_seq2	glutathione S-transferase	Microsomal glutathione S-transferase 3
m.32471	comp75727_c0_seq2	ketol-acid reductoisomerase	Ketol-acid reductoisomerase, chloroplastic
m.34092	comp76011_c0_seq2	PREDICTED: ankyrin repeat and zinc finger domain-containing protein 1-like	Ankyrin repeat and zinc finger domain-containing protein 1
m.34711	comp76105_c0_seq16	Hexose carrier	Hexose carrier protein HEX6
m.35228	comp76218_c0_seq1	heat shock protein 70	Heat shock cognate 70 kDa protein
m.35251	comp76225_c1_seq6	PREDICTED: pentatricopeptide repeat-containing protein At5g55840-like	Pentatricopeptide repeat-containing protein At5g55840
m.35982	comp76361_c0_seq2	unnamed protein product	Ubiquitin-like modifier-activating enzyme atg7
m.3600	comp61800_c0_seq1
m.36412	comp76450_c0_seq35	TRANSPARENT TESTA 12 protein	MATE efflux family protein 8
m.38230	comp76741_c0_seq2	PREDICTED: probable sulfate transporter 3.4-like isoform 2	Probable sulfate transporter 3.4
m.38357	comp76755_c0_seq30	PREDICTED: LEC14B homolog	LEC14B protein
m.41108	comp77161_c0_seq7	Cyclic nucleotide-gated ion channel	Probable cyclic nucleotide-gated ion channel 5
m.42220	comp77369_c0_seq7	PREDICTED: probable leucine-rich repeat receptor-like serine/threonine-protein kinase At3g14840-like	Probable leucine-rich repeat receptor-like serine/threonine-protein kinase At3g14840
m.43986	comp77648_c0_seq2	cytosolic purine 5-nucleotidase	5'-nucleotidase domain-containing protein DDB_G0275467
m.45121	comp77830_c0_seq5
m.45800	comp77933_c0_seq3	inositol-1,4,5-triphosphate-5-phosphatase	Type I inositol 1,4,5-trisphosphate 5-phosphatase 1
m.45954	comp77948_c0_seq3	conserved hypothetical protein
m.46073	comp77972_c0_seq9	conserved hypothetical protein
m.46426	comp78018_c0_seq7	predicted protein
m.46718	comp78038_c1_seq3	predicted protein	RING finger and CHY zinc finger domain-containing protein 1
m.46722	comp78038_c1_seq7	predicted protein	RING finger and CHY zinc finger domain-containing protein 1
m.46809	comp78044_c0_seq39	conserved hypothetical protein
m.47038	comp78080_c0_seq2	hypothetical protein VITISV_024375	BEL1-like homeodomain protein 9
m.47268	comp78102_c0_seq9	plastid alpha-amylase	Alpha-amylase 3
m.48169	comp78184_c0_seq28	PREDICTED: uncharacterized protein LOC100855398	Polyadenylate-binding protein 2-A
m.49100	comp78319_c0_seq4	PREDICTED: uncharacterized protein LOC100249152	Large proline-rich protein BAG6
m.49359	comp78331_c0_seq18	PREDICTED: superkiller viralicidic activity 2-like 2-like	Superkiller viralicidic activity 2-like 2
m.49635	comp78361_c0_seq18	predicted protein	Mitochondrial thiamine pyrophosphate carrier
m.50337	comp78458_c0_seq11	PREDICTED: pyruvate kinase	Pyruvate kinase, cytosolic isozyme
m.51217	comp78539_c0_seq18
m.51343	comp78561_c0_seq4	PREDICTED: uncharacterized protein LOC100245130
m.51589	comp78602_c0_seq2	F-box/LRR-repeat protein	F-box/LRR-repeat protein At3g59200
m.51900	comp78646_c0_seq2	hypothetical protein VITISV_037761
m.51907	comp78646_c0_seq9	hypothetical protein VITISV_037761
m.52703	comp78729_c0_seq17	uncharacterized protein
m.52784	comp78742_c0_seq5
m.54812	comp79002_c0_seq6	calmodulin-binding transcription factor SR2L	Calmodulin-binding transcription activator 4
m.57297	comp79253_c1_seq25	PREDICTED: uncharacterized protein LOC100853102
m.58095	comp79338_c0_seq2
m.58671	comp79416_c0_seq12	unnamed protein product	Autophagy-related protein 2_x0001_sp|P0CM30.1|ATG2_CRYNJ RecName: Full=Autophagy-related protein 2
m.61527	comp79742_c0_seq7	myosin XI-2	Myosin-J heavy chain
m.61745	comp79769_c0_seq2	white-brown-complex ABC transporter family	ABC transporter G family member 15
m.8836	comp68200_c0_seq2	PREDICTED: uncharacterized protein LOC100252506
m.8979	comp68310_c0_seq1	unnamed protein product
m.9654	comp68703_c0_seq2	PREDICTED: uncharacterized membrane protein YOL092W-like	Protein RTC2
m.9874	comp68812_c0_seq4	PREDICTED: uncharacterized protein LOC100262189
